# Supplementary material for: The KMT2D Kabuki syndrome histone methylase controls neural crest cell differentiation and facial morphology
Source: Oxford University Press journal article supplement (doi:10.1242/dev.187997), 2020-01-01
Supplement: dev187997supp.pdf [file dev187997supp.pdf]

Figure S1

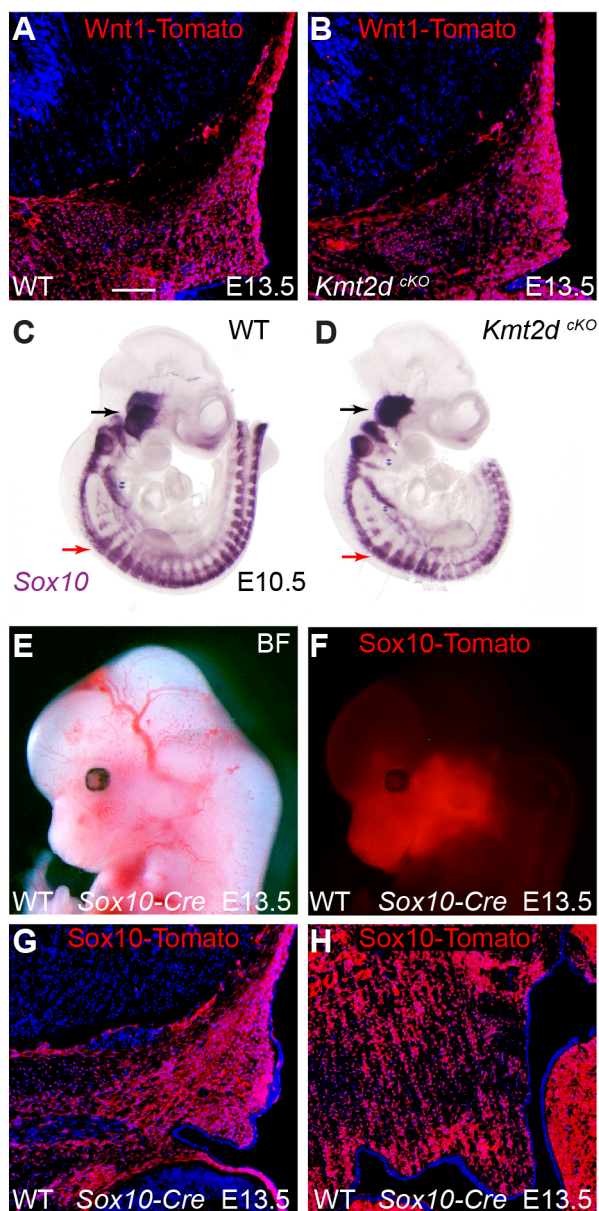

Figure S1: Localization of *Wnt1-Cre* and *Sox10-Cre* recombination domains and *Sox10* expression in *Kmt2d<sup>cKO</sup>* embryos. (A-B) E13.5 WT and *Kmt2d<sup>cKO</sup>* coronal sections of supraorbital frontal primordia indicating *Wnt1-Cre* driven tomato reporter fluorescence. White scale bar in A = 0.1 mm. (C-D) Whole mount RNA *in situ* hybridization for *Sox10* in WT and *Kmt2d<sup>cKO</sup>* E10.5 embryos. Black arrows indicate post-migratory NCC localization to trigeminal ganglia and red arrows depict dorsal root ganglia. (E-F) Bright field (BF) and tomato fluorescent images of NCC lineage tracing in WT E13.5 *Sox10-Cre* embryos. (G-H) Coronal sections through WT E13.5 *Sox10-Cre* supraorbital ridge (G) and palatal shelf (H) indicating efficient tomato reporter activity in NCCs from these regions.

Figure S2

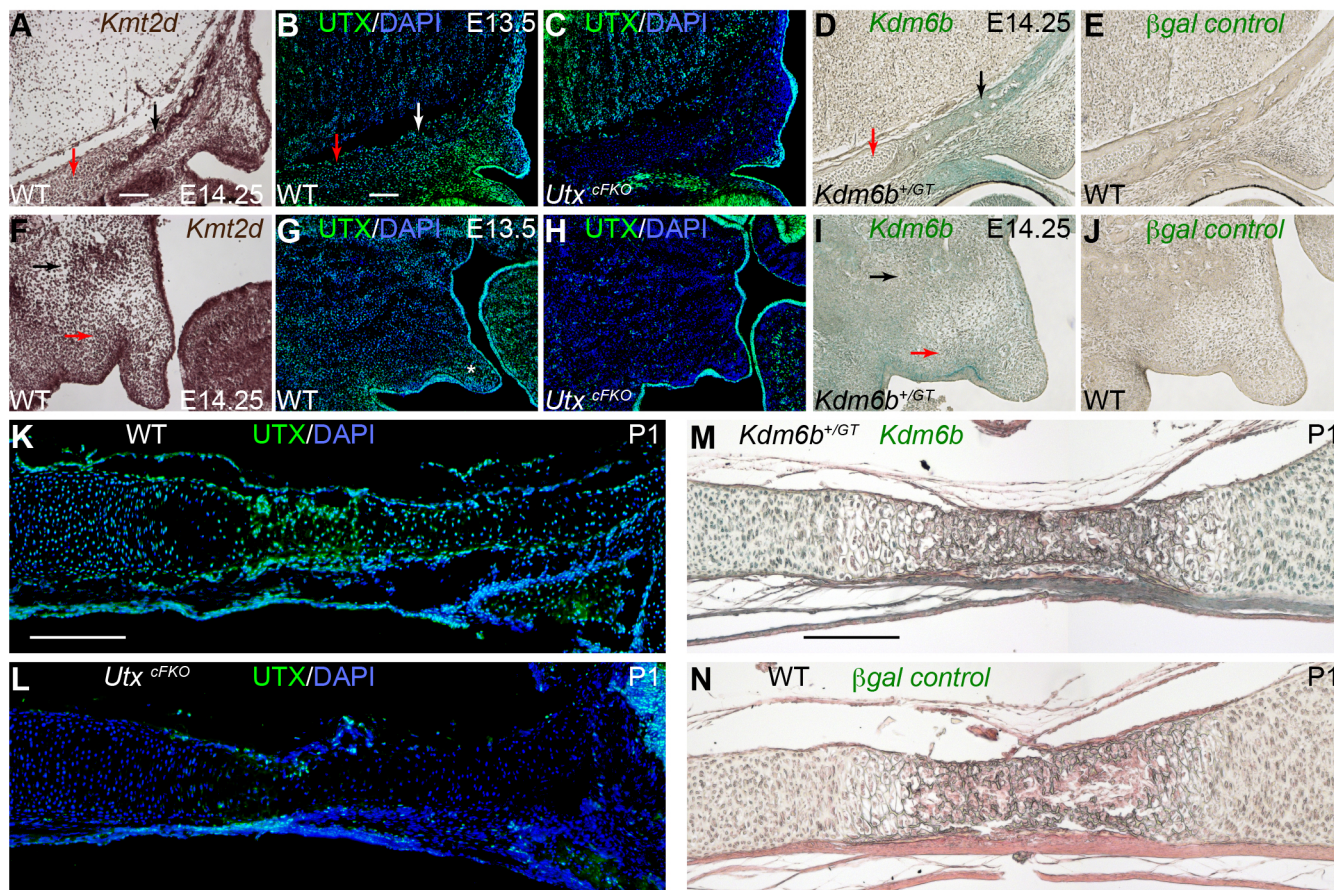

Figure S2: Expression patterns of *Kmt2d*, *Utx*, and *Kdm6b* in NCCs. (A-E) Expression in supraorbital frontal primordia. White scale bars in A and B = 0.1 mm. *Kmt2d* expression was analyzed by RNA *in situ* hybridization (A). UTX immunofluorescence was performed (B) with *Utx*<sup>cFKO</sup> tissue serving as negative control (C). *Kdm6b* expression was analyzed by X-Gal staining of a heterozygous *Kdm6b* gene trap (*Kdm6b*<sup>+GT</sup>) that fuses the transcript with  $\beta$ -galactosidase (D). WT sections served as control for the  $\beta$ -galactosidase assay (E). Black and white arrows in A-E denote osteoblasts while red arrows denote chondrocytes. (F-J) Expression patterns of *Kmt2d*, *Utx*, and *Kdm6b* in coronal palatal shelves with staining as indicated in parts A-E. Black arrows highlight osteoblast differentiation, red arrows depict subepithelial mesenchymal expression, and the white asterisk illustrated expression in the distal palatal tip. (K-N) Expression patterns of *Utx* and *Kdm6b* in sagittal presphenoid regions of the P1 cranial base with staining as indicated in parts B-E. White and black scale bars in K and M = 0.2 mm.



Figure S3

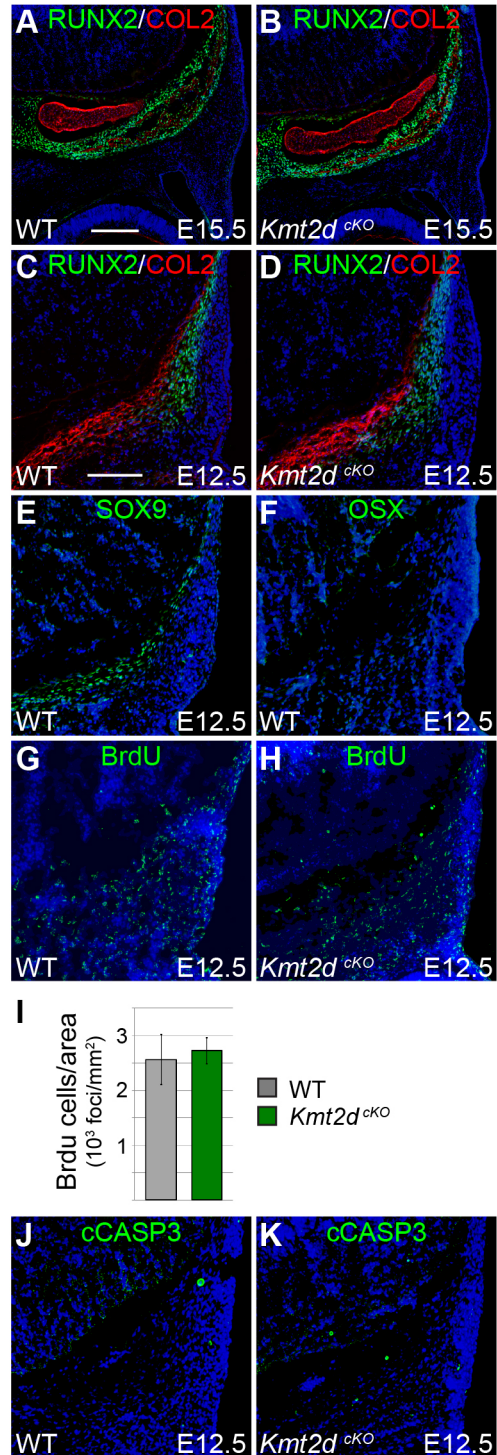

Figure S3: Cellular phenotypes in *Kmt2d<sup>CKO</sup>* supraorbital frontal primordia. (A-B) Osteoblast (RUNX2+) or chondrocyte (COL2+) domains in E15.5 WT or *Kmt2d<sup>CKO</sup>* frontal coronal sections. White scale bar in A = 0.2 mm. (C-D) Pre-osteoblast (RUNX2+) or pre-chondrocytes (COL2+) in E12.5 WT or *Kmt2d<sup>CKO</sup>* coronal sections of frontal primordia. White scale bar in C = 0.1 mm. (E) SOX9+ pre-chondrocytes in E12.5 WT coronal sections of frontal primordia. (F) E12.5 pre-osteoblasts do not express OSX. (G-H) E12.5 WT and *Kmt2d<sup>CKO</sup>* embryos were labeled with BrdU for 2 hours and detected by immunofluorescence. (I) E12.5 BrdU positive cells were counted from osteoblast regions (identified in parts C-D) and normalized to area scored.  $N \geq 4$  supraorbital osteoblast domains averaged from 3 sections spaced 60 microns apart. (J-K) Apoptotic cells were identified in E12.5 WT or *Kmt2d<sup>CKO</sup>* frontal primordia by immunofluorescence for active cleaved Caspase 3.



**Figure S4**

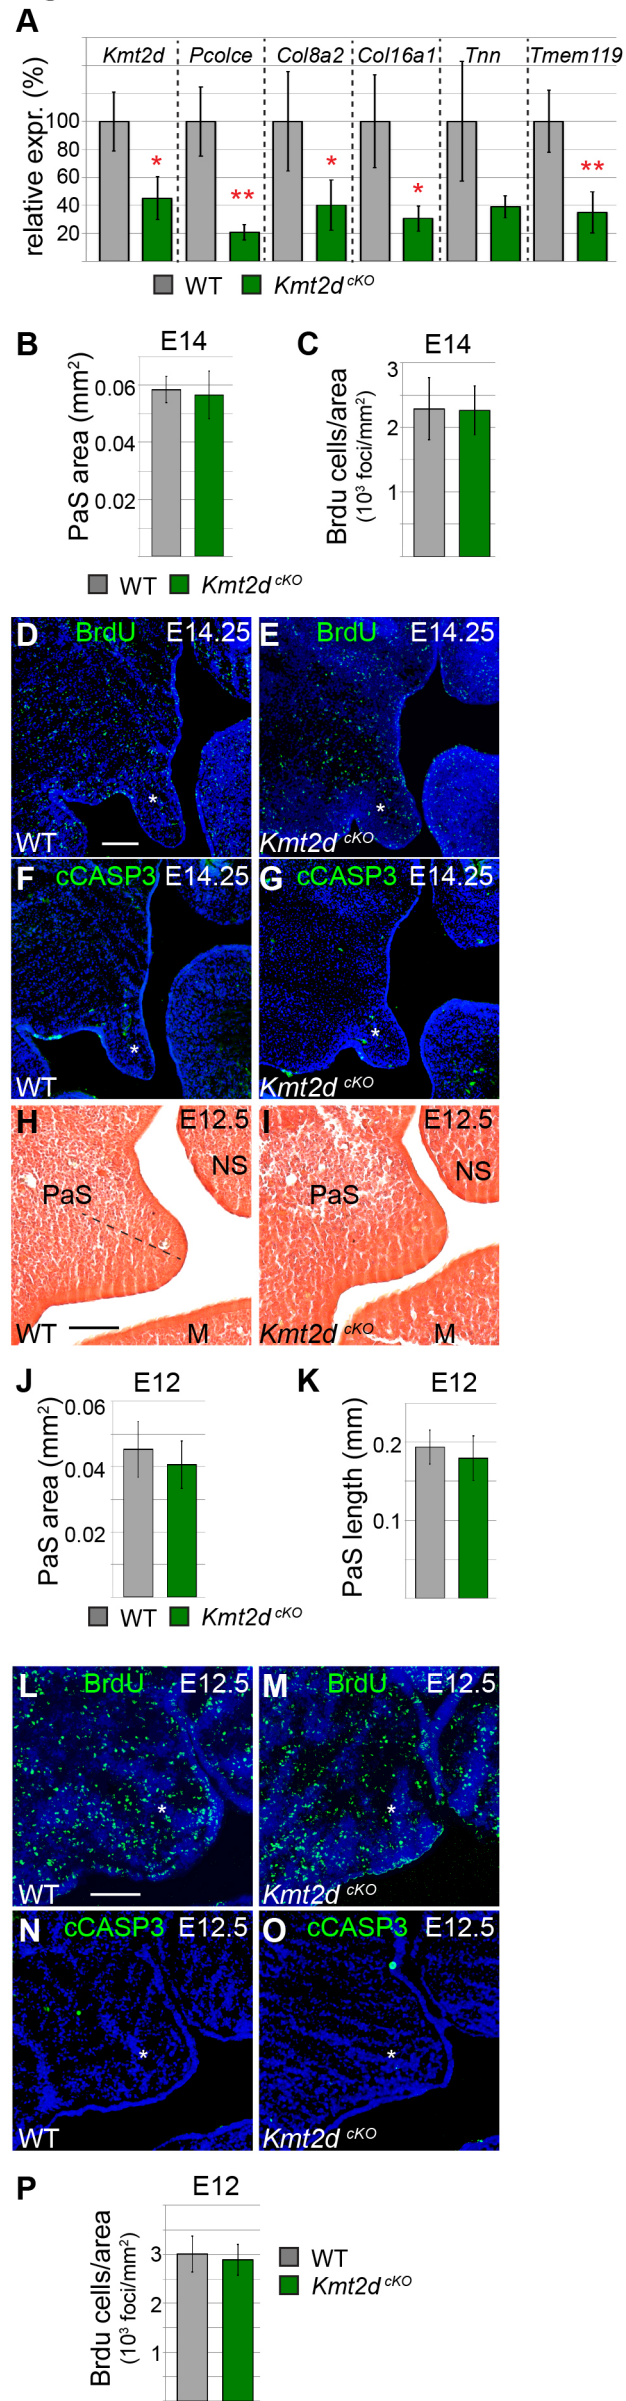

Figure S4: Cellular phenotypes in *Kmt2d<sup>ckO</sup>* palatal shelves. (A) qRT-PCR verification of genes identified in E14.25 *Kmt2d<sup>ckO</sup>* palatal shelf RNA-seq. (B) The area of the distal palatal shelf (PaS) tip indicated in Figure 5J-K was measured. N = 3 sets of palatal shelf distal tip measurements averaged from 2 anterior-central sections spaced 80 microns apart. (C) E14.25 WT and *Kmt2d<sup>ckO</sup>* embryos were labeled with BrdU for 2 hours and detected by immunofluorescence (D-E). White scale bar in D = 0.1 mm. BrdU positive cells were counted from the distal palatal tip (white asterisks) and plotted normalized to area scored (C). N = 4 sets of palatal shelf distal tip measurements averaged from 2 anterior-central sections spaced 80 microns apart. (F-G) Apoptotic cells were identified in E142.5 WT or *Kmt2d<sup>ckO</sup>* distal palatal extensions (white asterisks) by immunofluorescence for active cleaved Caspase 3. (H-I) Picrosirius red staining of E12.5 WT and *Kmt2d<sup>ckO</sup>* palatal outgrowths. Dashed line indicates region measured in part K. Black scale bar in H = 0.1 mm. (J-K) Measured area (J) and length (K) of the *Kmt2d<sup>ckO</sup>* palatal outgrowth indicated in parts H-I. Anterior to middle palatal sections were scored and quantified. N ≥ 7 sets of palatal shelf outgrowth measurements scored and quantified from anterior-central sections demonstrating the largest measurements. (L-M) E12.5 WT and *Kmt2d<sup>ckO</sup>* embryos were labeled with BrdU for 2 hours and detected by immunofluorescence in palatal outgrowths (white asterisks). White scale bar in L = 0.1 mm. (N-O) Apoptotic cells were identified in E12.5 WT or *Kmt2d<sup>ckO</sup>* palatal outgrowths by immunofluorescence for active cleaved Caspase 3. (P) BrdU positive cells were counted from the E12.5 anterior palatal outgrowths (white asterisks in parts L-M) and plotted normalized to area scored. N = 4 palatal shelf outgrowth measurements averaged from 2 anterior-central sections spaced 60 microns apart.

### Figure S5

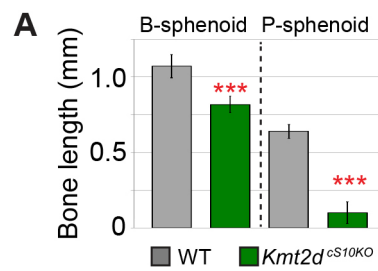

Figure S5: *Kmt2d*<sup>cS10KO</sup> cranial base quantitation. (A) Basisphenoid (B-sphenoid) and presphenoid (P-sphenoid) bone lengths were imaged and measured from whole mount alizarin red and alcian blue skeletal preparations in P1 WT and *Kmt2d*<sup>cS10KO</sup> pups. N ≥ 4.



Table S1: Differential gene expression analysis for RNA-seq on E14.25 WT and *Kmt2d<sup>cko</sup>* palatal shelves. Sheet 1: Significantly downregulated genes (FDR < 0.05) in *Kmt2d<sup>cko</sup>* palatal shelves. Sheet 2: Significantly upregulated genes (FDR < 0.05) in *Kmt2d<sup>cko</sup>* palatal shelves. Sheet 3: *Kmt2d<sup>cko</sup>* downregulated genes from sheet 1 with elevated WT expression (RPKM > 2) and greater fold change (*Kmt2d<sup>cko</sup>* logFC < -1). Sheet 4: Extracellular matrix components identified by MSigDB or IPA pathway analysis that were downregulated in *Kmt2d<sup>cko</sup>* palatal shelves.

[Click here to Download Table S1](#)

Table S2: Genotyping and qRT-PCR primers used in this study.

[Click here to Download Table S2](#)
